# Supplementary material
Source: HighWire-hosted journal article supplement (https://jnis.bmj.com/content/13/7/637)
Supplement: inline-supplementary-material-1 [file inline-supplementary-material-1.pdf]

**Supplementary Table 1.** Baseline characteristics of patients and arteriovenous malformation

| <i>Characteristic</i>                                  | <i>Values</i> |
|--------------------------------------------------------|---------------|
| Total number of patients, n                            | 51            |
| Age, years                                             |               |
| Median (IQR)                                           | 47 (33-59)    |
| Male sex, n (%)                                        | 31 (61)       |
| Hemorrhagic presentation                               | 42 (82)       |
| Modified Rankin Scale score before embolization, n (%) |               |
| 0                                                      | 12 (24)       |
| 1                                                      | 21 (41)       |
| 2                                                      | 8 (16)        |
| 3-5                                                    | 10 (20)       |
| Side of arteriovenous malformation, n (%)              | 16 (31)       |
| Right                                                  | 23 (45)       |
| Left                                                   | 12 (24)       |
| Midline                                                |               |
| Location, n (%)                                        |               |
| Deep                                                   | 30 (59)       |
| Cortical                                               | 21 (41)       |
| Spetzler-Martin grade at first presentation, n (%)     |               |
| Size                                                   |               |
| < 3cm                                                  | 34 (67)       |
| 3cm≤, <6cm                                             | 12 (24)       |
| 6cm≤                                                   | 5 (10)        |
| Eloquence                                              | 32 (63)       |
| Deep drainage                                          | 30 (59)       |
| Grade                                                  |               |

---

|                                              |         |
|----------------------------------------------|---------|
| I                                            | 9 (18)  |
| II                                           | 6 (12)  |
| III                                          | 29 (57) |
| IV                                           | 6 (12)  |
| V                                            | 1 (2)   |
| Previously treated, n (%)                    | 33 (65) |
| Number of main outflow draining veins, n (%) |         |
| 1                                            | 49 (96) |
| 2                                            | 2 (3.9) |

---

IQR, interquartile range: n, number
